# Supplementary material for: Urban–rural disparities in mild cognitive impairment and its functional subtypes among community-dwelling older residents in central China
Source: PubMed Central journal article supplement — Gen Psychiatr. 2021 Oct 27;34(5):e100564. doi: 10.1136/gpsych-2021-100564 (PMC8557279; doi:10.1136/gpsych-2021-100564), 2021-10-27
Supplement: gpsych-2021-100564supp001.pdf [file gpsych-2021-100564supp001.pdf]

## Urban–rural Disparities in Mild Cognitive Impairment and Its Functional Subtypes among Community-dwelling Older Residents in Central China

Supplemental Table S1. Characteristics of the samples stratified by sex and residence areas.

| Characteristics                          | Total<br>(n, %) | Urban (n, %) |            | Rural (n %) |            |
|------------------------------------------|-----------------|--------------|------------|-------------|------------|
|                                          |                 | Male         | Female     | Male        | Female     |
| Total                                    | 2644            | 840          | 965        | 479         | 360        |
| Age # **                                 | 70 (67,75)      | 71 (67,76)   | 70 (67,74) | 70 (67,74)  | 70 (67,74) |
| Education (years) # **                   | 9 (5,12)        | 12 (9,15)    | 9 (9,12)   | 5 (0,6)     | 0 (0,3)    |
| Educational level ( $\leq 6$ years) **   | 940 (35.6)      | 87 (10.4)    | 156 (16.2) | 364 (76.0)  | 333 (92.5) |
| Unmarried **                             | 581 (22.0)      | 67 (8.0)     | 209 (21.7) | 185 (38.6)  | 120 (33.3) |
| Living alone **                          | 383 (14.5)      | 49 (5.8)     | 98 (10.2)  | 154 (32.2)  | 82 (22.8)  |
| Having at least a surviving sibling **   | 1,818 (68.8)    | 648 (77.1)   | 723 (74.9) | 251 (52.4)  | 196 (54.4) |
| Having close friends **                  | 1,703 (64.4)    | 618 (73.6)   | 752 (77.9) | 179 (37.4)  | 154 (42.8) |
| Current smoking (yes) **                 | 793 (30.0)      | 454 (54.0)   | 13 (1.3)   | 309 (64.5)  | 17 (4.7)   |
| Drinking (yes) **                        | 655 (24.8)      | 335 (39.9)   | 27 (2.8)   | 249 (52.0)  | 44 (12.2)  |
| Healthy diet (fresh fish consumption) ** | 2,190 (82.8)    | 761 (90.6)   | 883 (91.5) | 335 (69.9)  | 211 (58.6) |
| Physical activities (yes)**              | 2,129 (80.5)    | 753 (89.6)   | 834 (86.4) | 303 (63.3)  | 239 (66.4) |
| Cognitive activities (yes)**             | 1,777 (67.2)    | 722 (86.0)   | 749 (77.6) | 210 (43.8)  | 96 (26.7)  |
| Insomnia (yes) **                        | 1,372 (51.9)    | 344 (41.0)   | 524 (54.3) | 256 (53.4)  | 248 (68.9) |
| BMI level**                              |                 |              |            |             |            |
| Underweight ( $< 18.5$ )                 | 136 (5.5)       | 23 (2.9)     | 48 (5.1)   | 42 (10.2)   | 23 (7.8)   |
| Normal (18.5 – 23.9)                     | 1,234 (50.2)    | 375 (46.5)   | 493 (52.2) | 224 (54.2)  | 142 (48.1) |
| Overweight (24.0 – 27.9)                 | 855 (34.8)      | 323 (40.1)   | 306 (32.4) | 125 (30.3)  | 101 (34.2) |
| Obesity ( $\geq 28.0$ )                  | 233 (9.5)       | 85 (10.5)    | 97 (10.3)  | 22 (5.3)    | 29 (9.8)   |
| Hypertension (yes)*                      | 1,618 (61.2)    | 530 (63.1)   | 566 (58.7) | 283 (59.1)  | 239 (66.4) |
| Diabetes (yes)**                         | 449 (17.0)      | 183 (21.8)   | 171 (17.7) | 41 (8.6)    | 54 (15.0)  |

Note: BMI = body mass index. # Continuous variables (e.g., age and education) were not normally distributed. \*  $p < 0.05$ , \*\*  $p < 0.001$ .
